# Supplementary material for: Development of Vang Danh anthracite as a cost-effective anode for sodium-ion batteries through a heat-treatment process
Source: Royal Society of Chemistry journal article supplement (doi:10.1039/d2ra05514g), 2022-01-01
Supplement: d2ra05514g1.pdf [file d2ra05514g1.pdf]

## SUPPORTING INFORMATION

### DEVELOPMENT OF VANG DANH ANTHRACITE AS COST-EFFECTIVE ANODE FOR SODIUM-ION BATTERIES THROUGH HEAT-TREATMENT PROCESS

Kha Le Minh,<sup>a,c,d</sup> Nhan Tran Thanh,<sup>b,c,d</sup> Tuyen Huynh Thi Kim,<sup>b,c,d</sup> Hoang Nguyen Van,<sup>b,c,d</sup> Thanh  
Vo Duy,<sup>a,c,d</sup> Man Tran Van,<sup>a,b,c,d</sup> and Phung Le My Loan<sup>a,b,c,d\*</sup>

<sup>a</sup>*Faculty of Chemistry, University of Science, Vietnam National University, Ho Chi Minh city.*

<sup>b</sup>*Applied Physical Chemistry Laboratory (APCLAB), University of Science, Vietnam National  
University, Ho Chi Minh city.*

<sup>c</sup>*University of Science, Vietnam National University, Ho Chi Minh city.*

<sup>d</sup>*Vietnam National University, Ho Chi Minh city (VNUHCM).*

#### Contents:

**Figure S1.** The XRD fitting of (a) RAW, (b) CHEM, (c) 9003, (d) 9006, (e) 90012, and (f) HC samples.

**Figure S2.** The Raman fitting of (a) RAW, (b) CHEM, (c) 9003, (d) 9006, (e) 90012, and (f) HC samples.

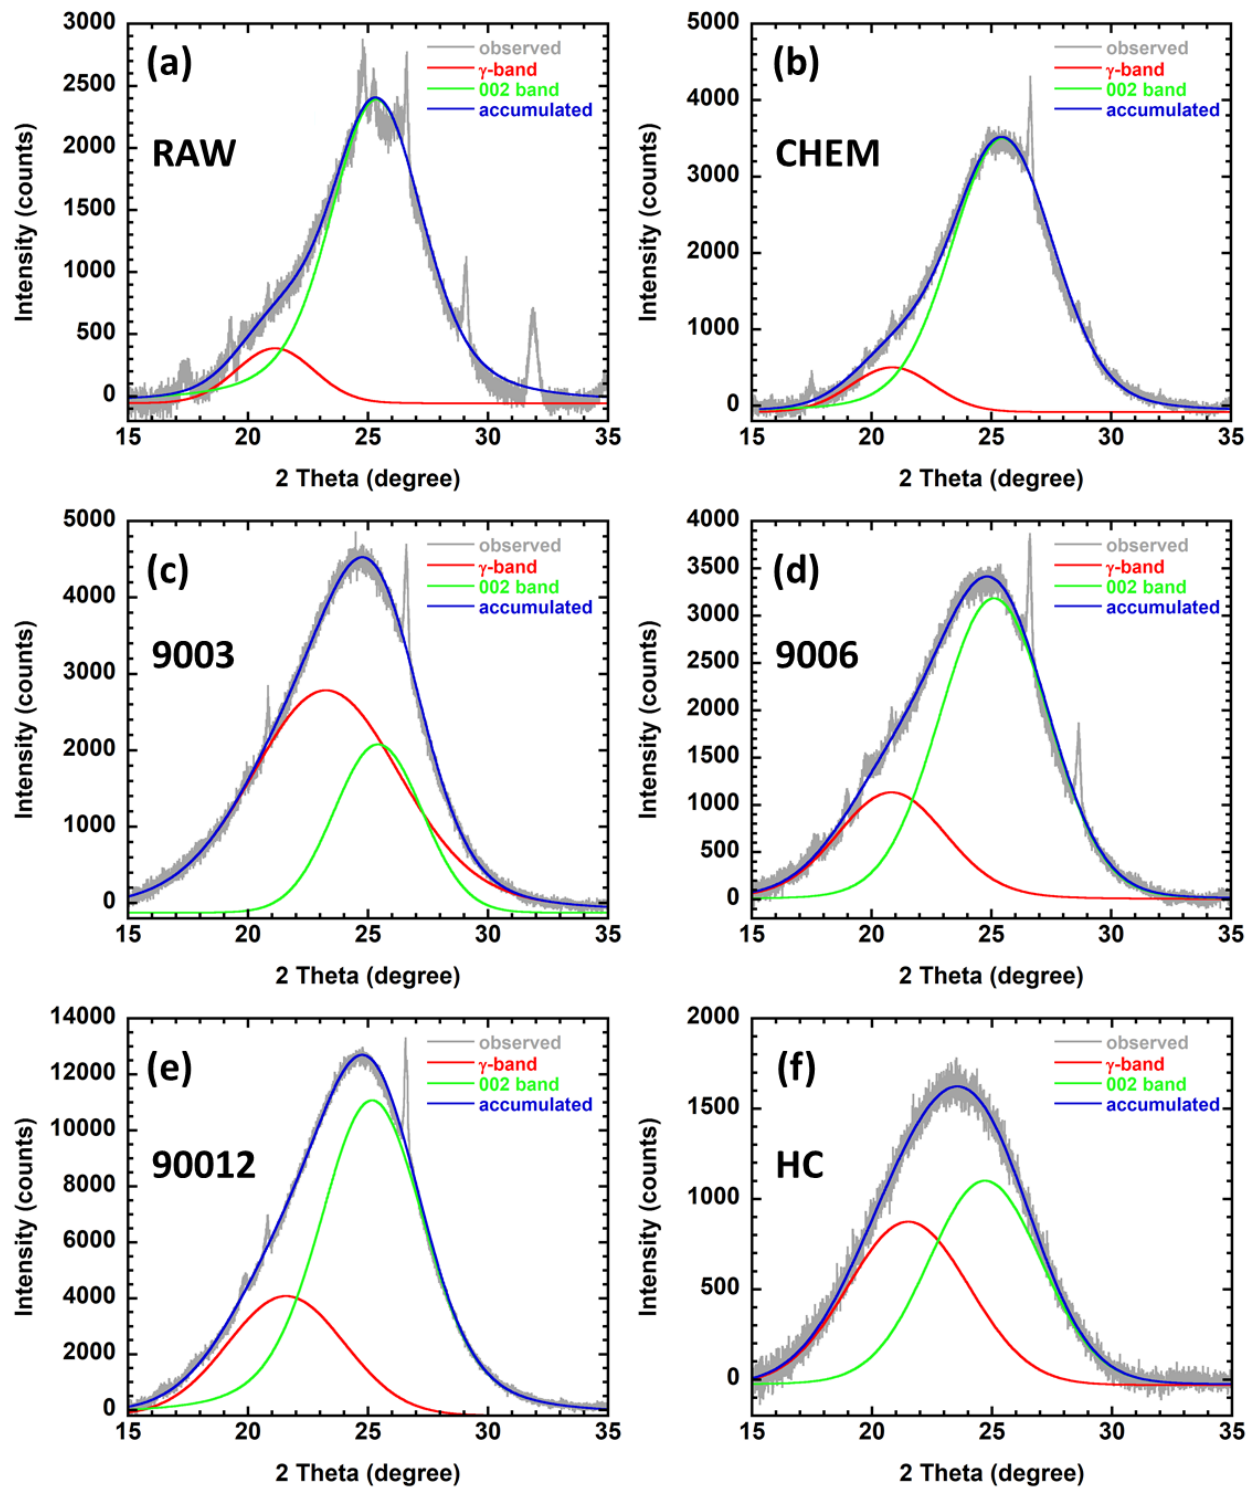

**Figure S1.** The XRD fitting of (a) RAW, (b) CHEM, (c) 9003, (d) 9006, (e) 90012, and (f) HC samples.

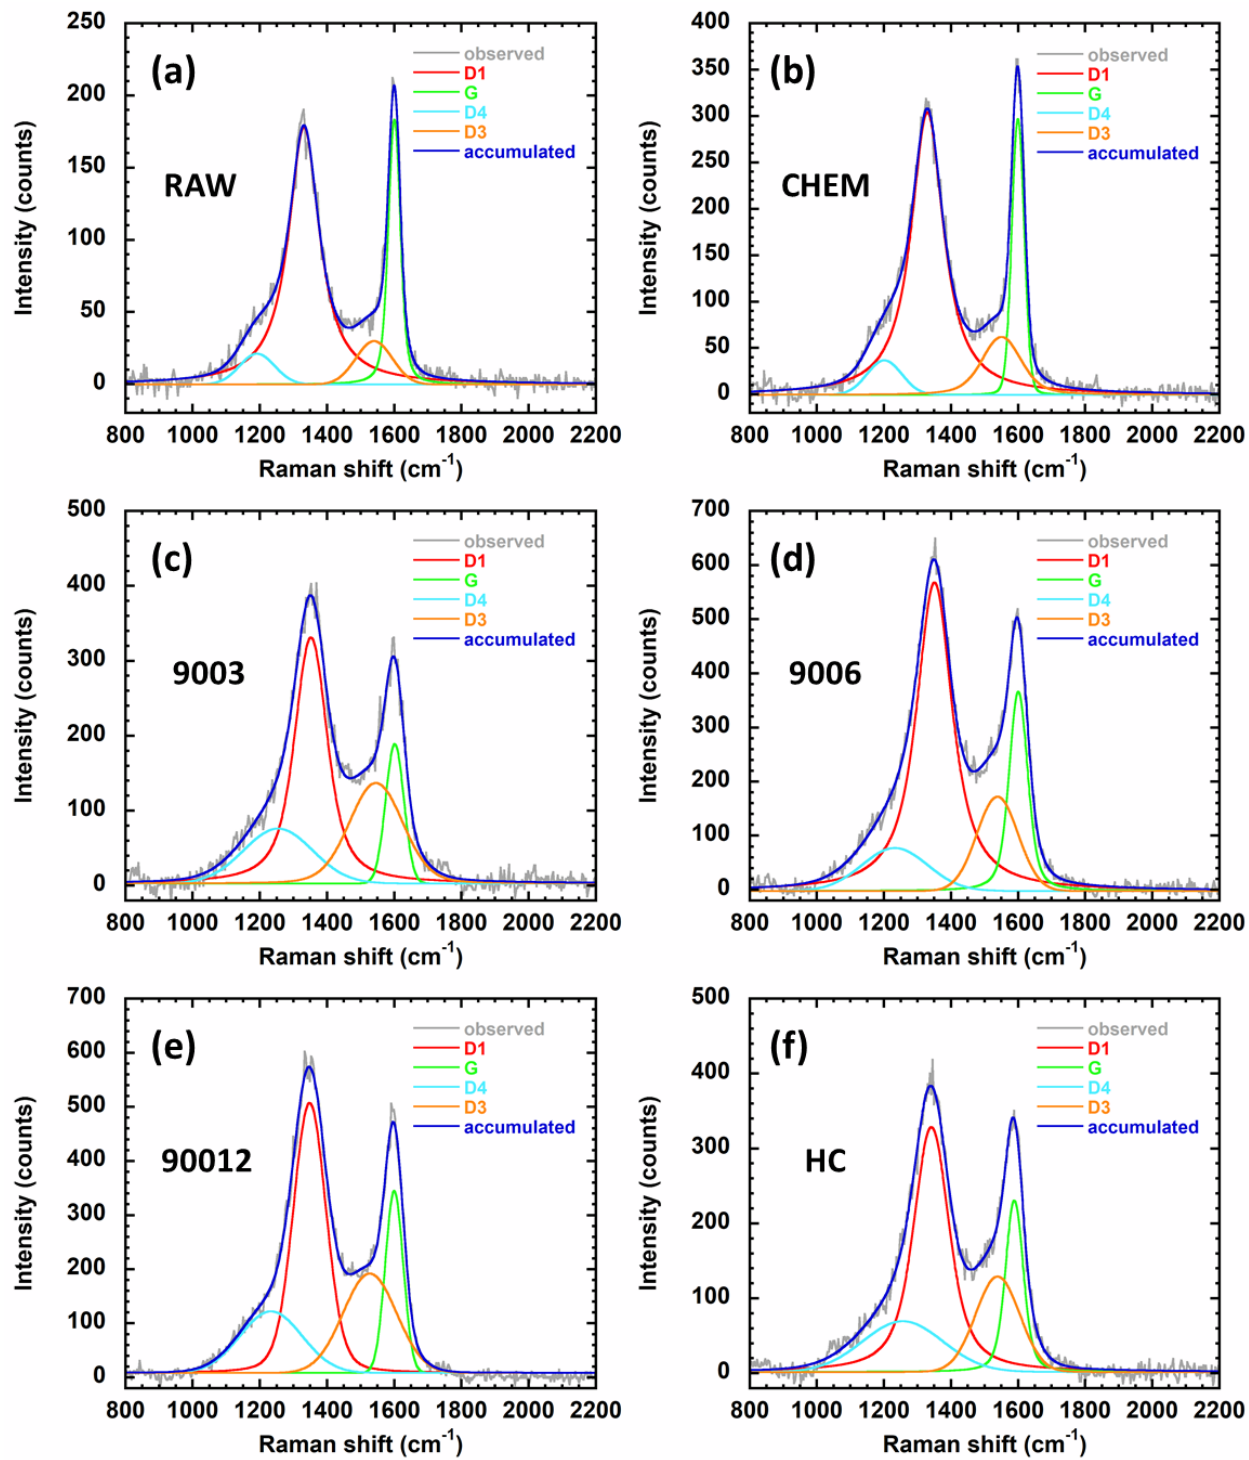

**Figure S2.** The Raman fitting of (a) RAW, (b) CHEM, (c) 9003, (d) 9006, (e) 90012, and (f) HC samples.
